# Supplementary material for: Stratification by Non-invasive Biomarkers of Non-alcoholic Fatty Liver Disease in Children
Source: Frontiers journal article supplement (doi:10.3389/fped.2022.846273), 2022-04-04
Supplement: Data_Sheet_1.pdf [file Data_Sheet_1.pdf]

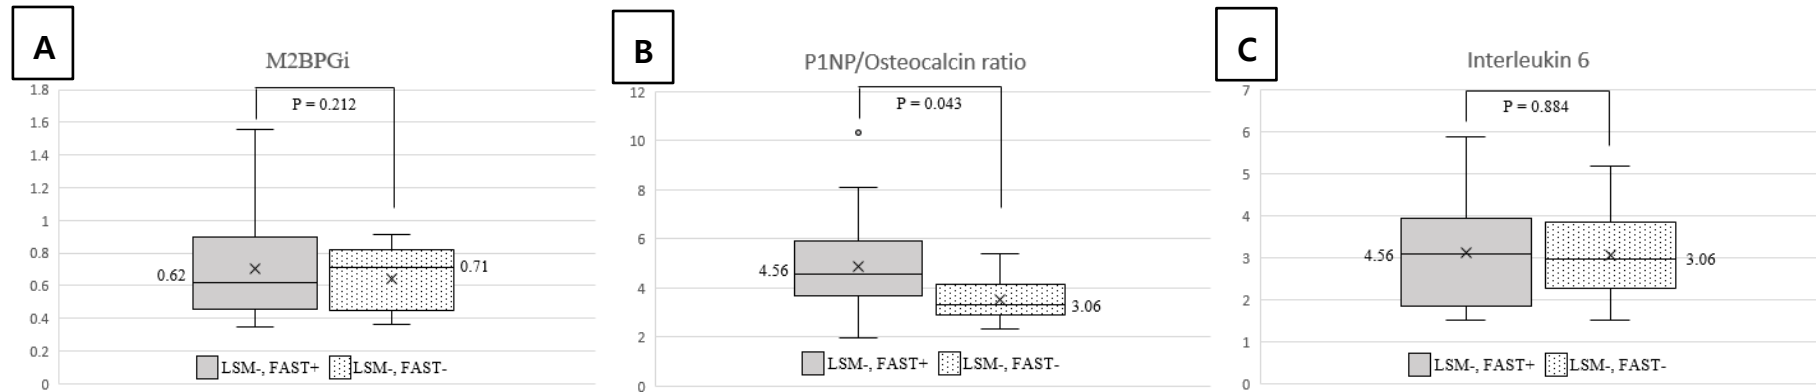

**Supplementary Figure 1.** (a) Boxplots comparing the median values and interquartile ranges of M2BPGi between a group with negative LSM (kPa) and positive FAST scores and a group with both negative LSM (kPa) and FAST scores. (b) Boxplots comparing the median values and interquartile ranges of the P1NP/Osteocalcin ratio between a group with negative LSM (kPa) and positive FAST scores, and a group with both negative LSM (kPa) and FAST scores. (c) Boxplots comparing the median values and interquartile ranges of interleukin 6 between a group with negative LSM (kPa) and FAST scores, and a group with both negative LSM (kPa) and FAST scores.

M2BPGi; Mac-2 binding glycosylation, P1NP; Procollagen type 1 N-terminal propeptide, LSM; Liver stiff measurement, FAST; Fibroscan-AST

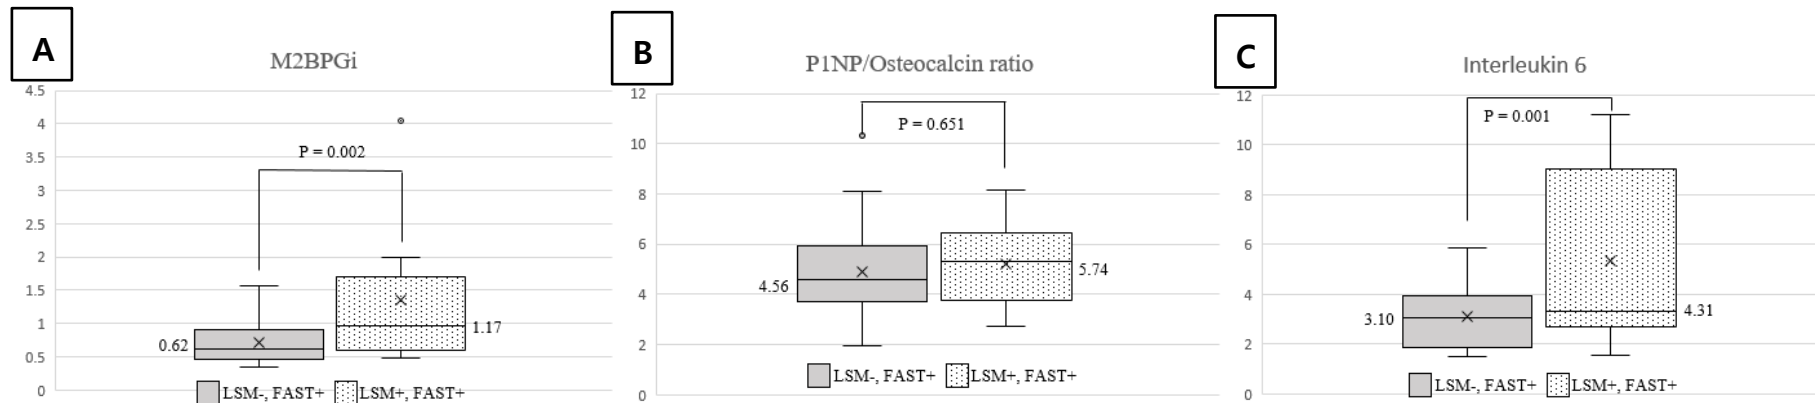

**Supplementary Figure 2.** (a) Boxplots comparing the median values and interquartile ranges of M2BPGi between a group with negative LSM (kPa) and positive FAST scores, and a group with both positive LSM (kPa) and FAST scores. (b) Boxplots comparing the median values and interquartile ranges of P1NP/Osteocalcin ratio between a group with negative LSM (kPa) and positive FAST scores and a group with both positive LSM (kPa) and FAST scores. (c) Boxplots comparing the median values and interquartile ranges of interleukin 6 between a group with negative LSM (kPa) and positive FAST scores, and a group with both positive LSM (kPa) and FAST scores.

M2BPGi; Mac-2 binding glycosylation, P1NP; Procollagen type 1 N-terminal propeptide, LSM; Liver stiff measurement, FAST; Fibroscan-AST
